# Supplementary material for: Plasmacytoid dendritic cells are functionally exhausted while non-haematopoietic sources of type I interferon dominate human autoimmunity
Source: bioRxiv or medRxiv preprint supplement (doi:10.1101/502047), 2018-12-20
Supplement: Supplementary file [file media-1.pdf]

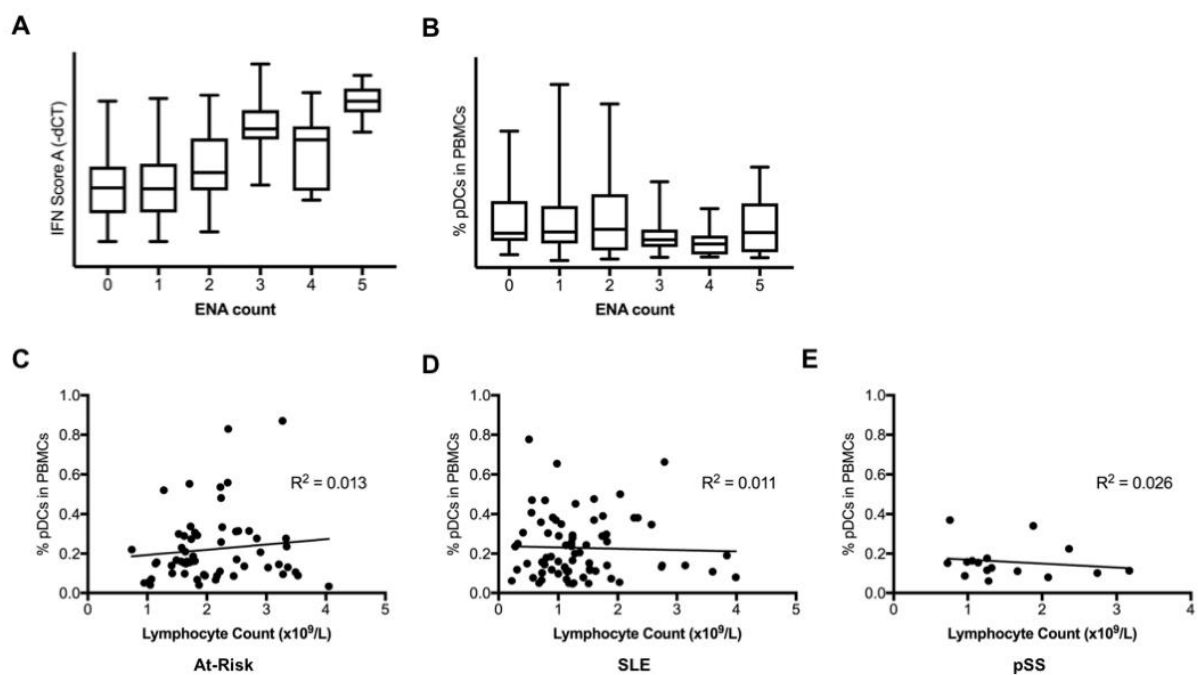

**Supplemental Figure 1.** Association of peripheral pDCs with other immunological parameters. **(A)** Higher IFN Score A was correlated to a higher ENA count. **(B)** The percentage of pDCs in peripheral blood showed no correlation with ENA count. **(C)** Association of percentage of pDCs in peripheral blood and lymphocyte count in At-Risk individuals. **(D)** Association of percentage of pDCs in peripheral blood and lymphocyte count in patients with SLE. **(E)** Association of percentage of pDCs in peripheral blood and lymphocyte count in patients with pSS. Data are represented as mean  $\pm$  SEM. Nonlinear regression **(C-E)**.

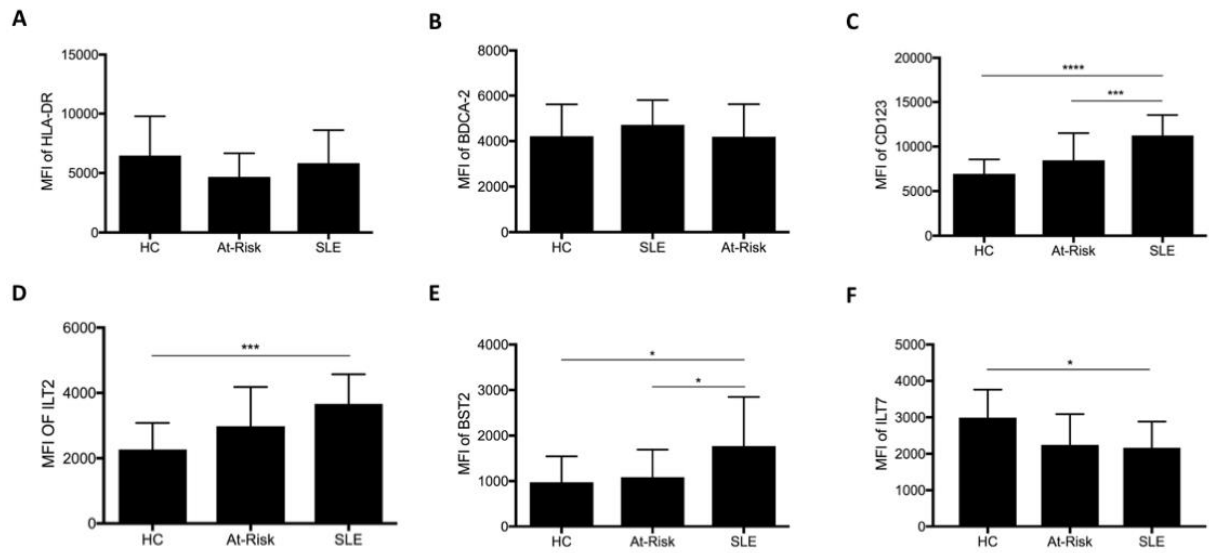

**Supplemental Figure 2.** Phenotyping peripheral pDCs in At-Risk individuals and patients with SLE in comparison with healthy controls (HC) for the expression of HLA-DR (**A**), BDCA-2 (**B**), CD123 (**C**), ILT2 (**D**), BST2 (**E**), and ILT7 (**F**). Data are represented as mean  $\pm$  SEM. \* $P < 0.05$ ; \*\*\* $P < 0.001$ . 2-way ANOVA (**A-F**).

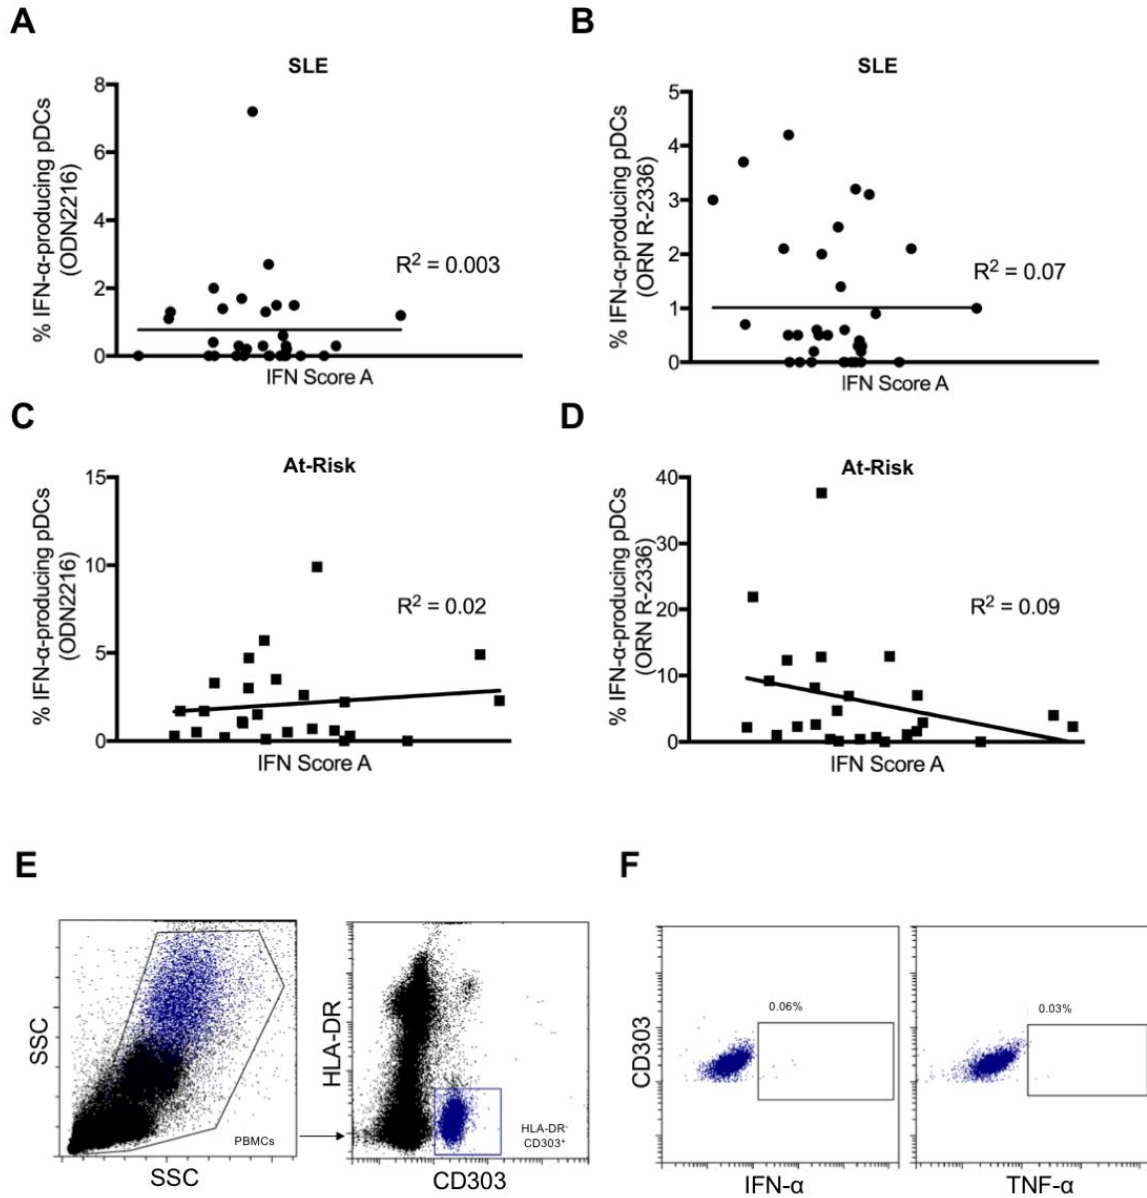

**Supplemental Figure 3.** (A-D) No association between TLR-mediated IFN- $\alpha$  production and IFN Score A in SLE patients and at-risk individuals. (E) Gating of HLA-DR<sup>+</sup>CD303<sup>+</sup> cells from cultured PBMCs. (F) No production of IFN- $\alpha$  or TNF- $\alpha$  was detected by HLA-DR<sup>+</sup>CD303<sup>+</sup> cells after TLR9 stimulation (ODN 2216). Data are represented as mean  $\pm$  SEM. Nonlinear regression (A-D).

**A**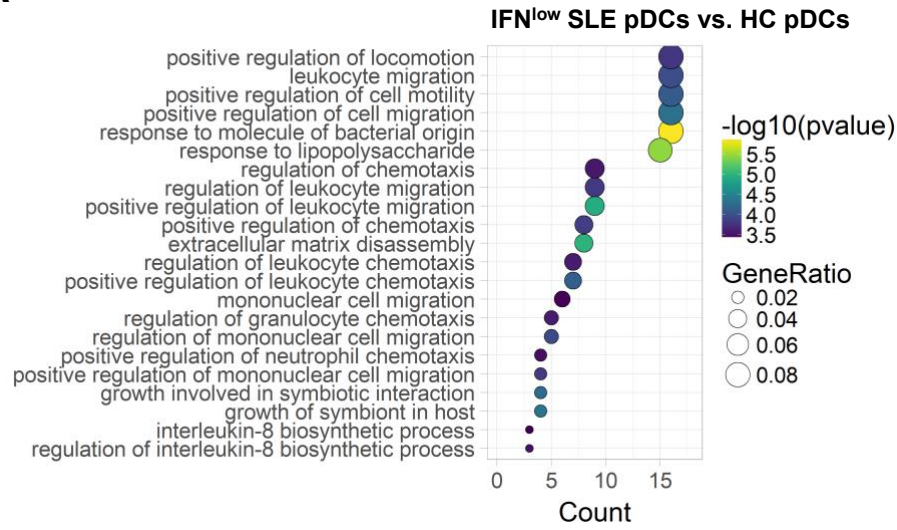**B**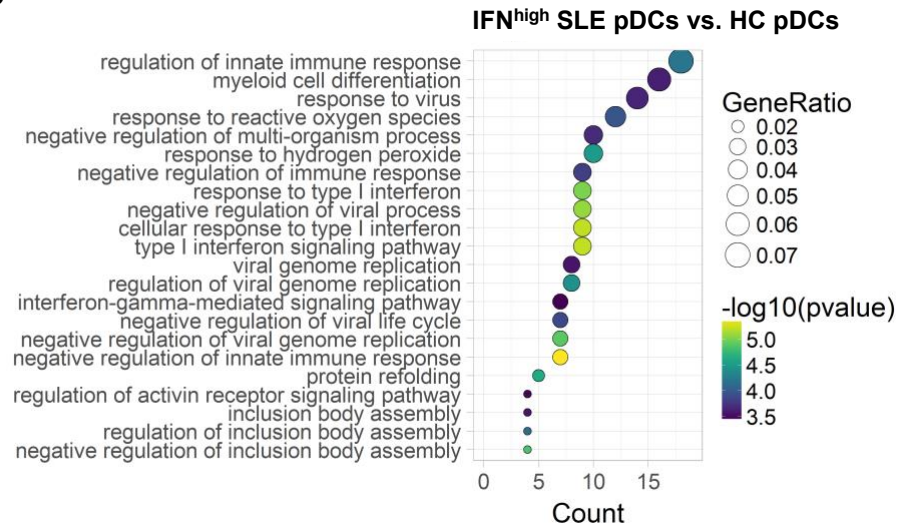**C**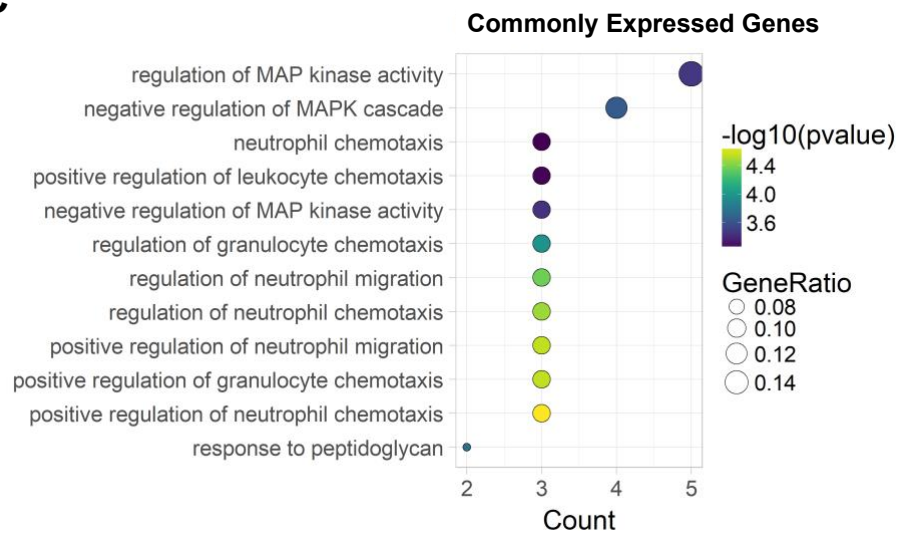

**Supplemental Figure 4.** Gene Ontology Biological Process Term Enrichment in differentially expressed genes in pDCs of IFN<sup>low</sup> SLE patients (A), IFN<sup>high</sup> SLE patients (B) and genes commonly expressed to both (C) in comparison with pDCs from healthy controls.

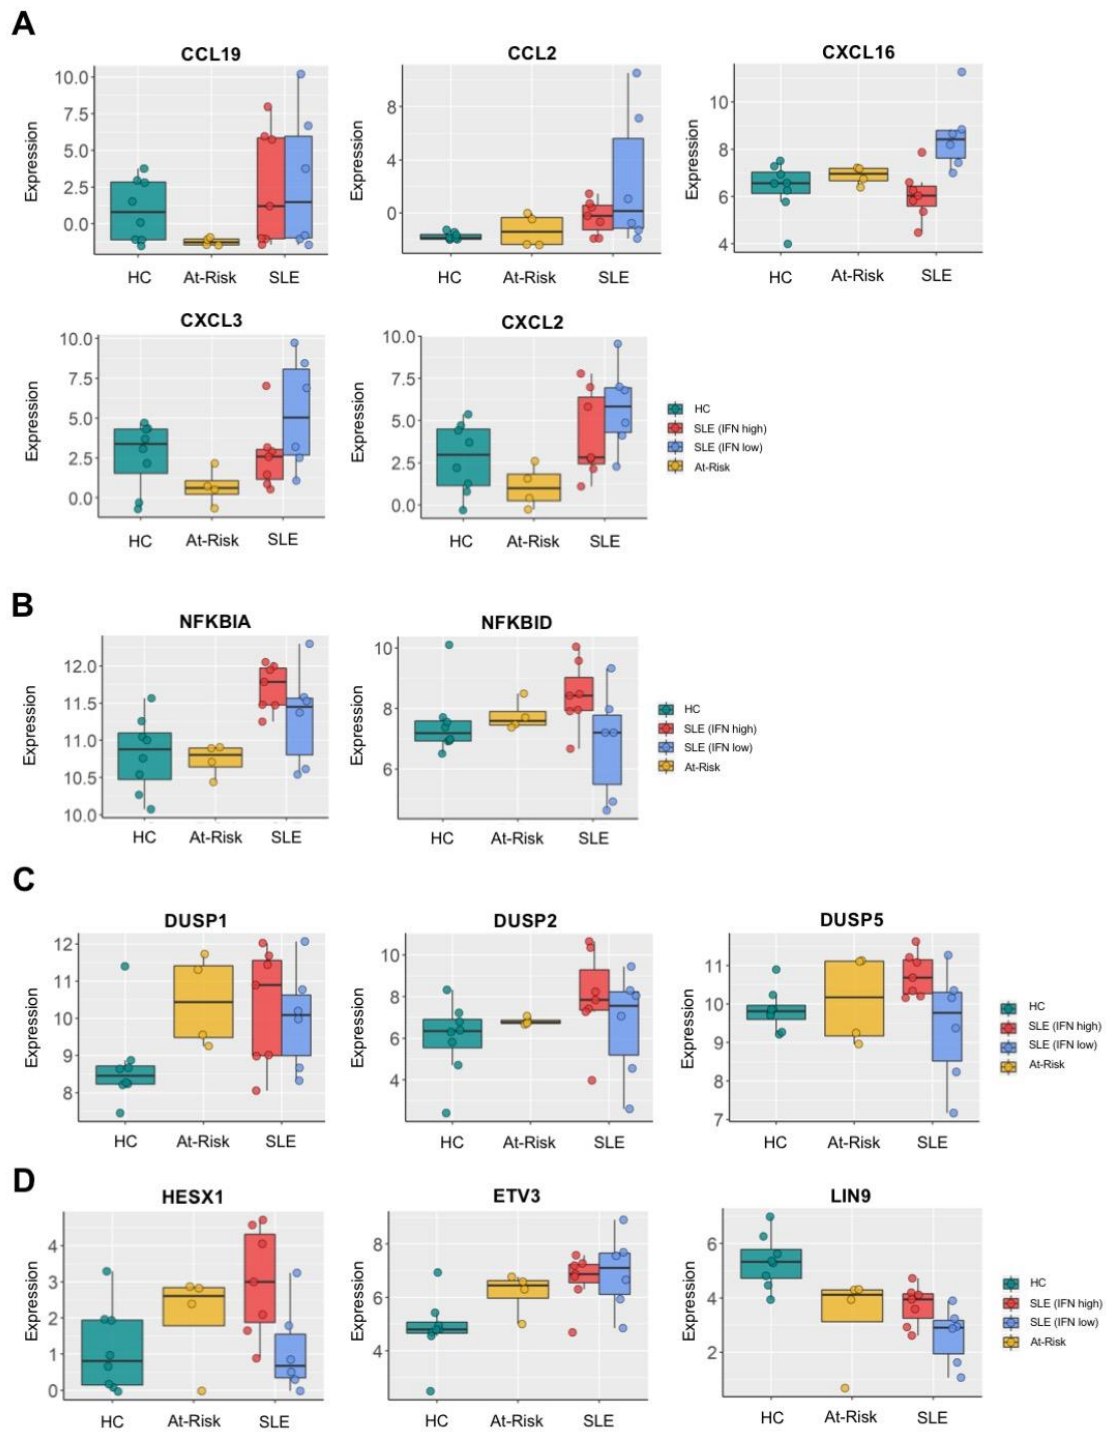

**Supplemental Figure 5.** Differentially expressed genes in pDCs of healthy controls (HC), at-risk individuals (At-Risk), IFN<sup>low</sup> SLE and IFN<sup>high</sup> SLE patients: **(A)** Chemokines; **(B)** NF-κB inhibitors; **(C)** Phosphatases; **(D)** Transcriptional repressors.

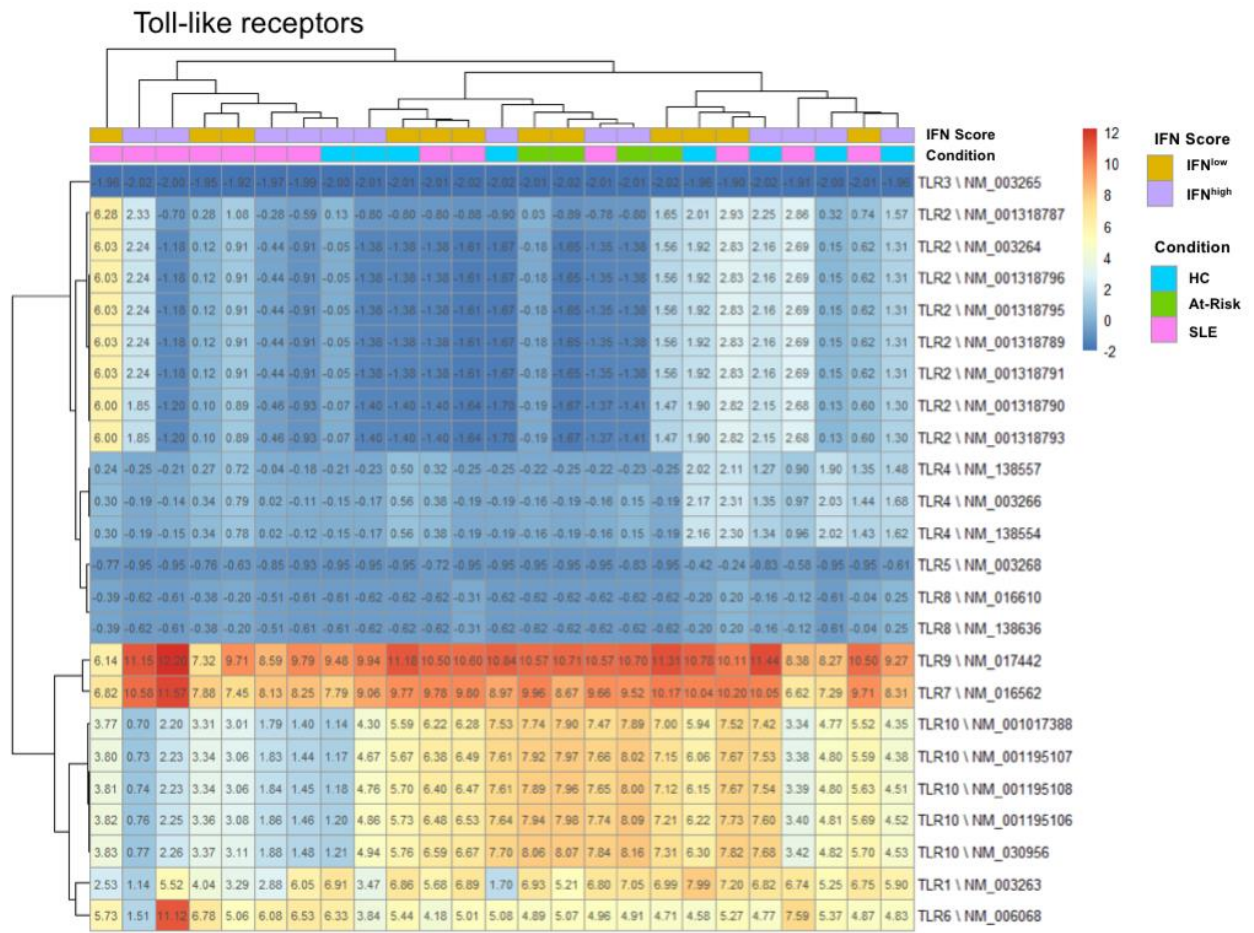

**Supplemental Figure 6.** Differential expression of Toll-like receptors (TLRs) in pDCs of healthy controls (HC), at-risk individuals (At-Risk), and SLE patients.

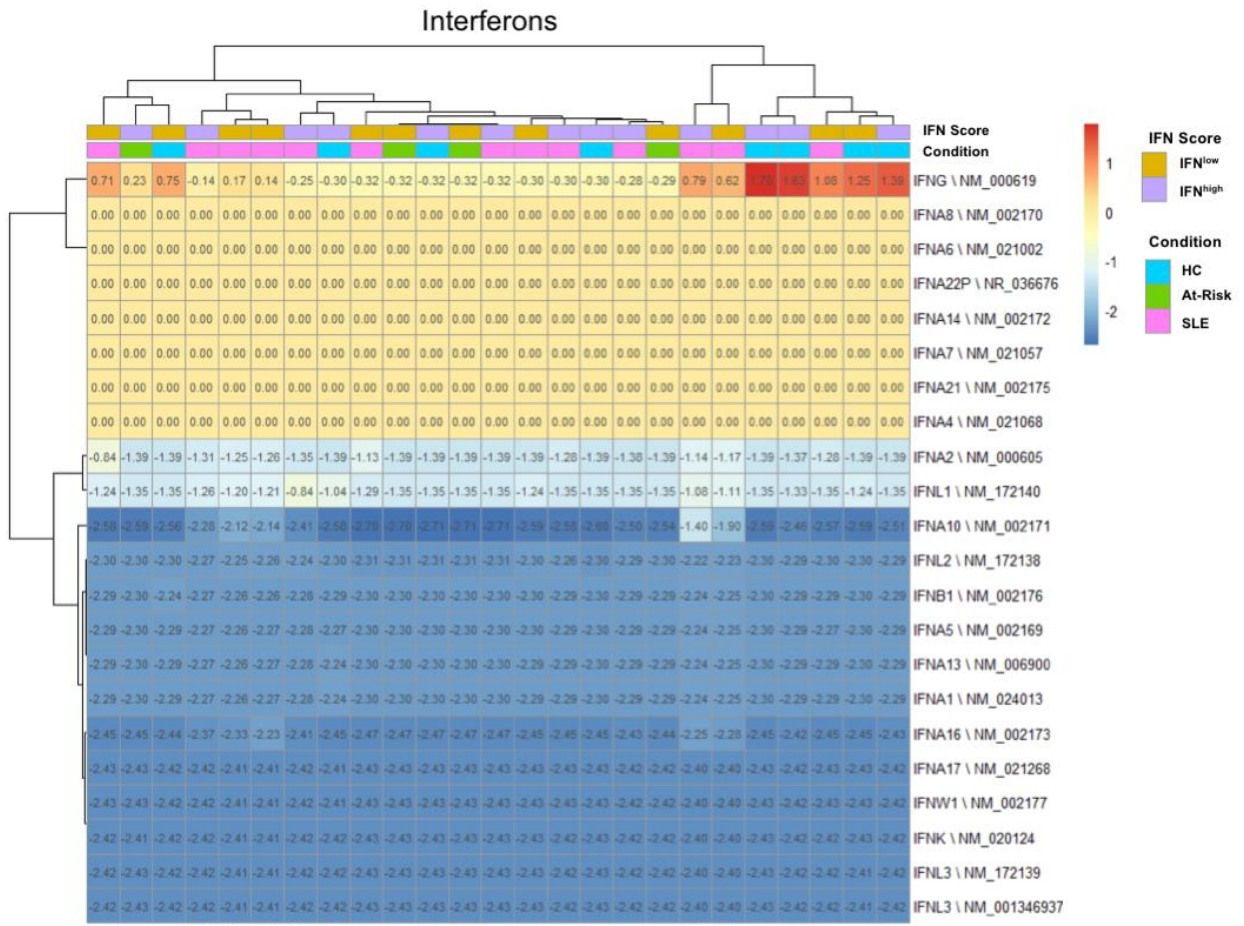

**Supplemental Figure 7.** Differential expression of type I, II, and III IFNs in pDCs of healthy controls (HC), at-risk individuals (At-Risk), and SLE patients.

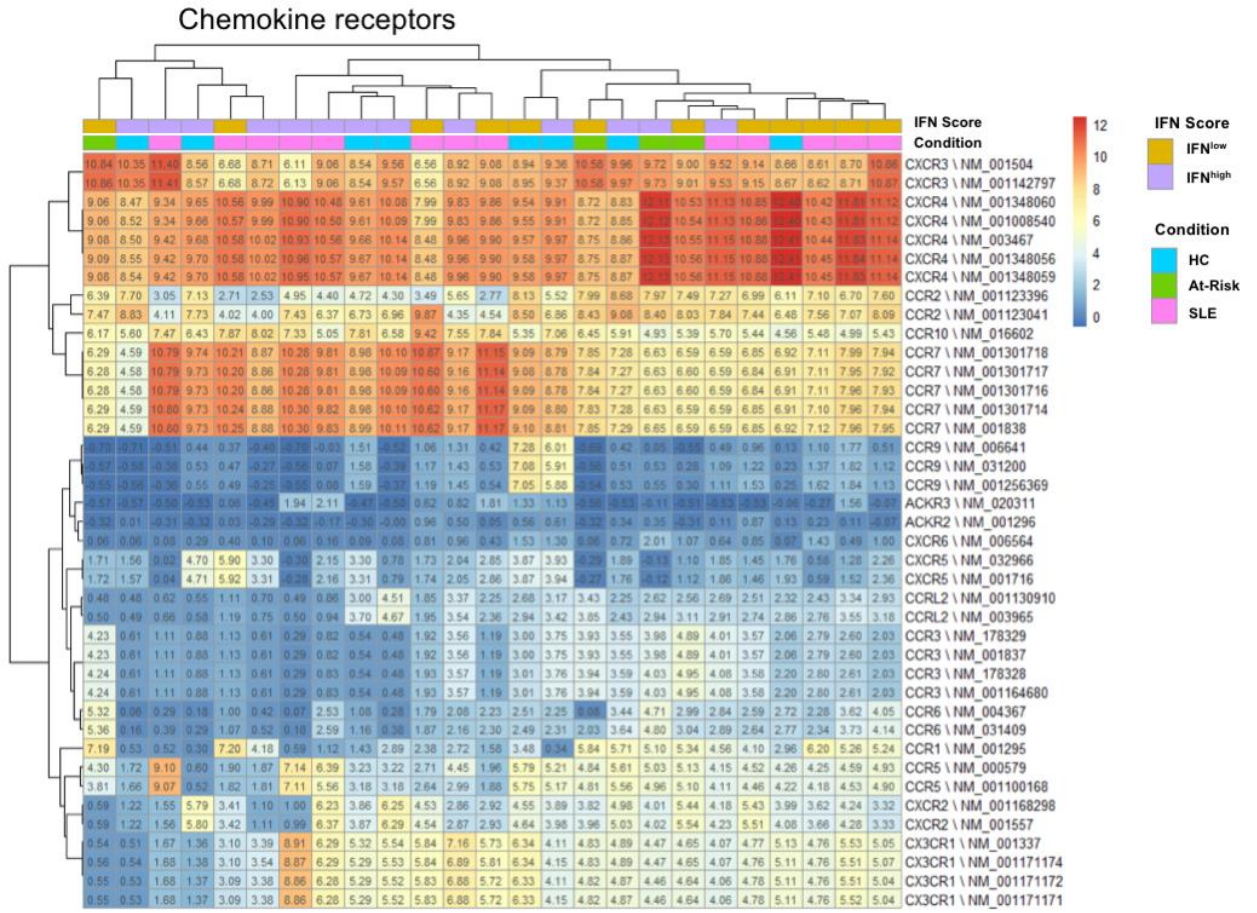

**Supplemental Figure 8.** Differential expression of chemokine receptors in pDCs of healthy controls (HC), at-risk individuals (At-Risk), and SLE patients.



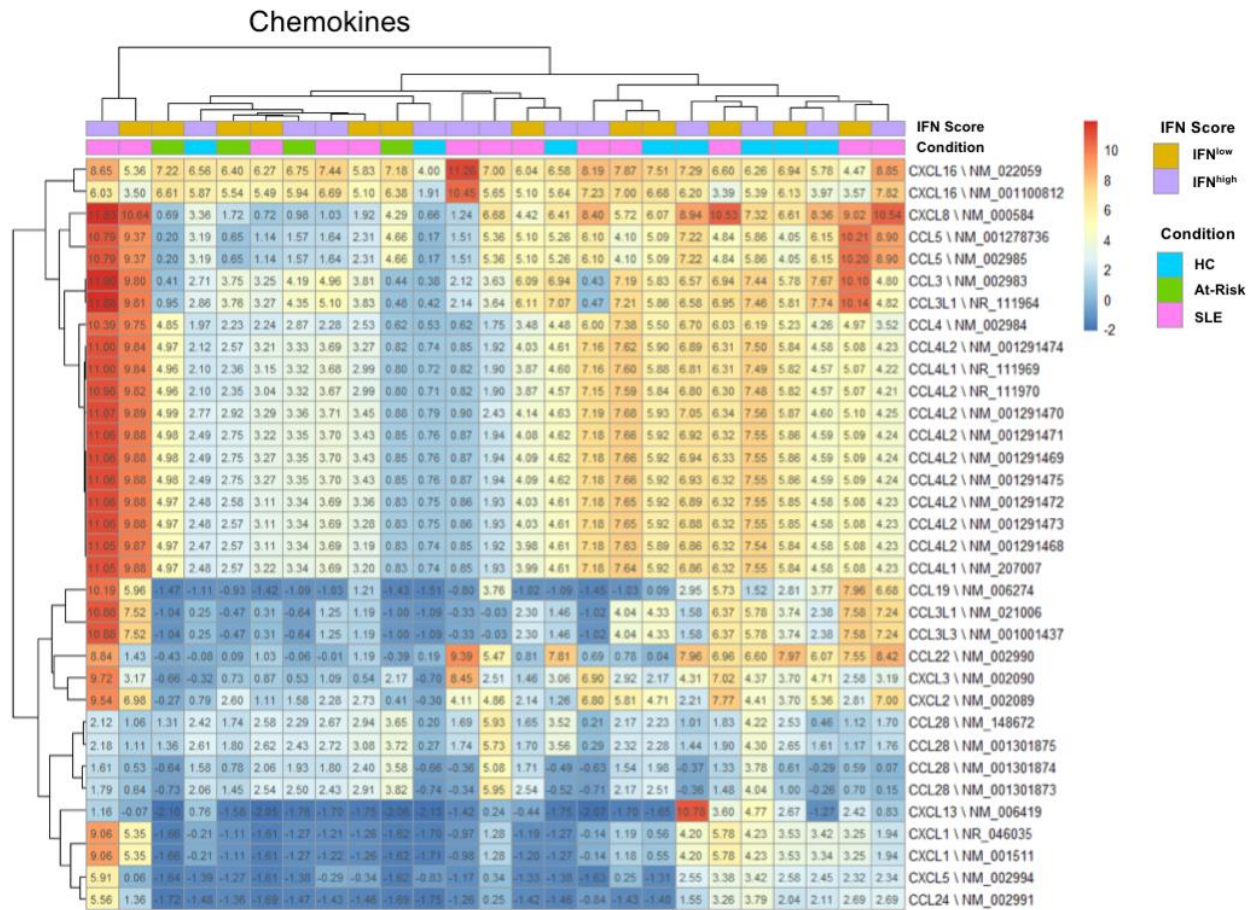

**Supplemental Figure 9.** Differential expression of chemokines in pDCs of healthy controls (HC), at-risk individuals (At-Risk), and SLE patients.

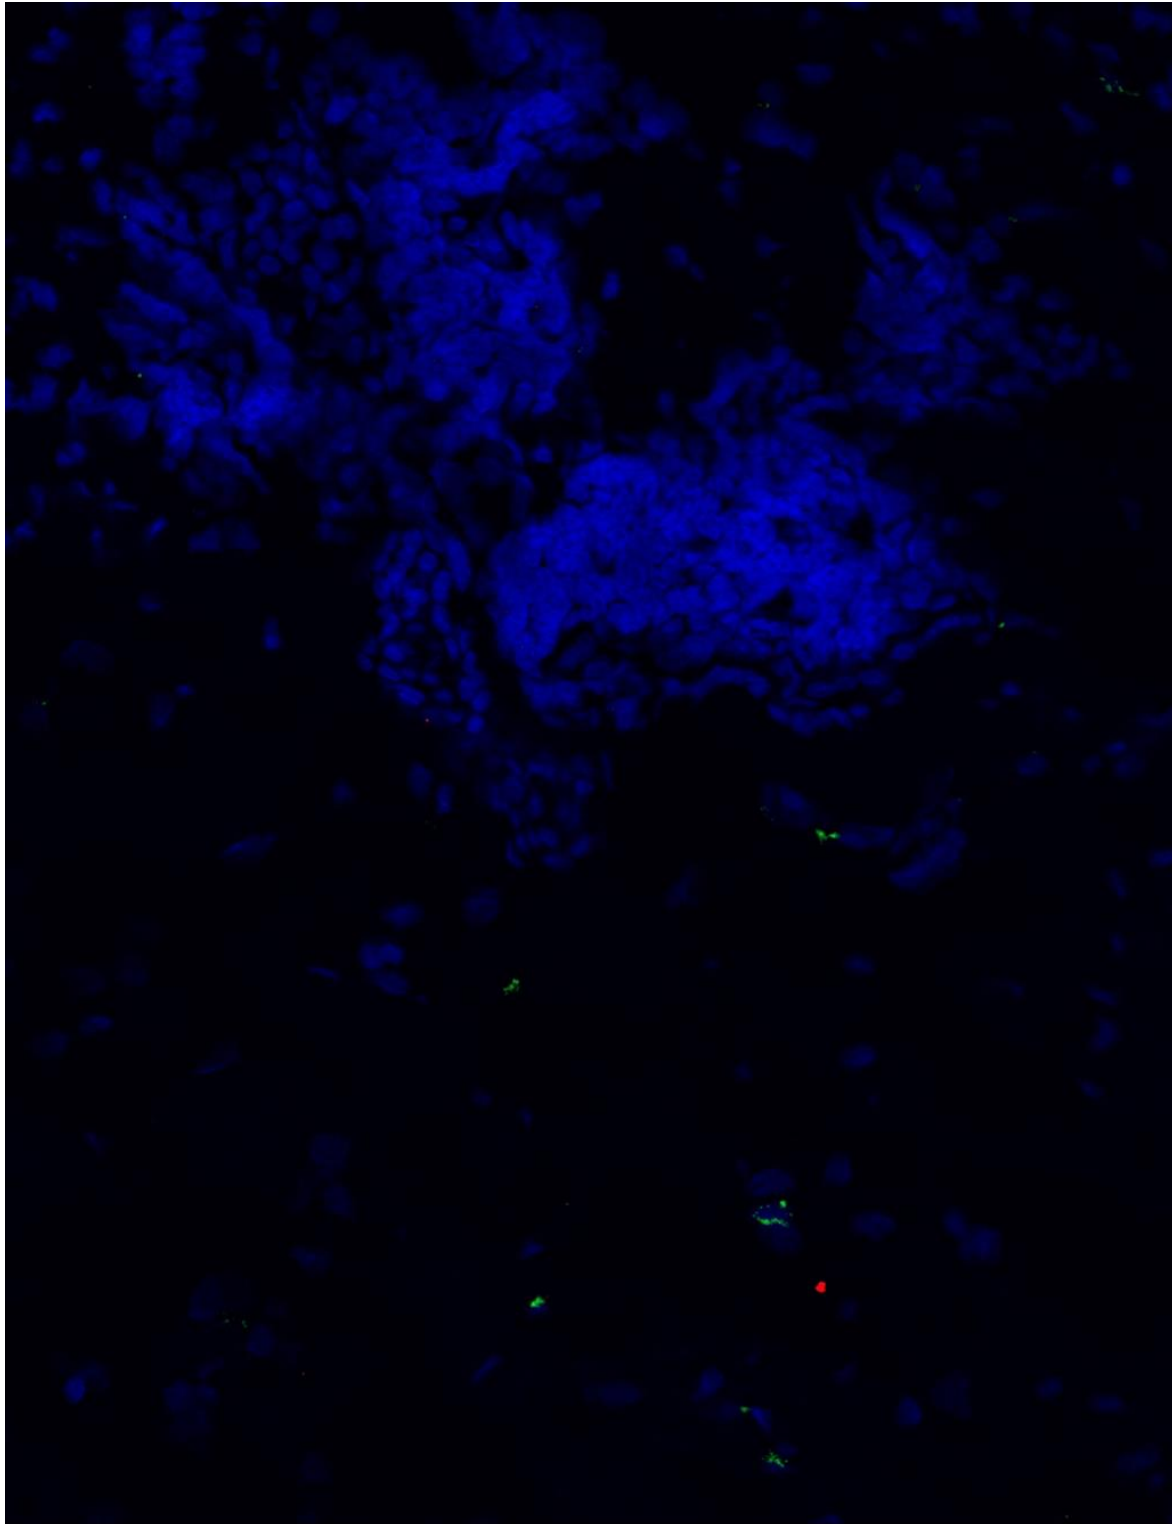

DAPI IFNK (Cy3) IFNA2 (FITC)

**Supplemental Figure 10.** Area of leucocyte infiltration and connective tissue of a patient with SLE with active skin lesion. Skin biopsies were hybridized using RNAscope *in situ* hybridization technology with custom-designed target probes for *IFNA2* and *IFNK*. Hybridization signals were amplified and detected using TSA Plus fluorescein (FITC) for *IFNA2* and TSA Plus Cyanine 3 (Cy3) for *IFNK*. Nuclei were highlighted using DAPI. *IFNA2* expression was detected in cells within the connective tissue but not in infiltrating leucocytes.

|                                        |             |
|----------------------------------------|-------------|
| Age, median (range) years              | 44 (18 -76) |
| Female patients (%)                    | 94          |
| Ethnicity (%)                          |             |
| Caucasian                              | 74          |
| South Asian                            | 16          |
| East Asian                             | 5           |
| African/Caribbean                      | 5           |
| Clinical symptoms: BILAG Score A/B (%) |             |
| Mucocutaneous                          | 23          |
| Musculoskeletal                        | 23          |
| Haematological                         | 3           |
| Renal                                  | 16          |
| Neurological                           | 3           |
| Cardiorespiratory                      | 2           |
| Gastrointestinal                       | 3           |
| Ophthalmic                             | 0           |
| General                                | 0           |
| Hydroxychloroquine (%)                 | 83          |
| Other immunosuppressants (%)           |             |
| Methotrexate                           | 14          |
| Azathioprine                           | 18          |
| Mycophenolate mofetil                  | 27          |
| Cyclophosphamide                       | 1           |
| Oral steroids (%)                      | 47          |

**Supplemental Table 1.** Clinical characteristics and treatment of SLE patients.

| IFN <sup>low</sup> SLE pDCs vs. HC pDCs |                    |         |         |
|-----------------------------------------|--------------------|---------|---------|
| Gene                                    | Fold Change (log2) | P value | FDR     |
| ULBP2                                   | 19.757             | < 0.001 | < 0.001 |
| C10orf35                                | 18.302             | < 0.001 | < 0.001 |
| TPSB2                                   | 18.228             | < 0.001 | < 0.001 |
| TMEM216                                 | -4.981             | < 0.001 | < 0.001 |
| CXCL2                                   | 6.379              | < 0.001 | < 0.001 |
| PLA2G7                                  | 9.712              | < 0.001 | < 0.001 |
| DNAJB4                                  | 1.965              | < 0.001 | 0.001   |
| ZBP1                                    | -7.254             | < 0.001 | 0.001   |
| LUCAT1                                  | 6.207              | < 0.001 | 0.006   |
| LOC100861532                            | 2.839              | < 0.001 | 0.007   |
| LGALSL                                  | 6.161              | < 0.001 | 0.007   |
| SNORD95                                 | 4.390              | < 0.001 | 0.007   |
| LOC100008587                            | 3.428              | < 0.001 | 0.007   |
| BBC3                                    | 2.962              | < 0.001 | 0.011   |
| SPR                                     | 6.792              | < 0.001 | 0.015   |
| FN1                                     | 4.352              | < 0.001 | 0.015   |
| PHF3                                    | 1.125              | < 0.001 | 0.015   |
| HSPB1                                   | 1.527              | < 0.001 | 0.015   |
| CLEC5A                                  | 8.287              | < 0.001 | 0.015   |
| CKAP4                                   | -6.563             | < 0.001 | 0.015   |
| IRAIN                                   | 5.493              | < 0.001 | 0.015   |
| FAM157C                                 | 3.945              | < 0.001 | 0.015   |
| DNAJB1                                  | 2.108              | < 0.001 | 0.015   |
| ETV3                                    | 3.037              | < 0.001 | 0.017   |
| TPSAB1                                  | 9.650              | < 0.001 | 0.020   |
| SLC6A6                                  | 3.758              | < 0.001 | 0.020   |
| NPAS1                                   | 5.880              | < 0.001 | 0.020   |
| GADD45B                                 | 2.245              | < 0.001 | 0.021   |
| IFITM1                                  | -3.619             | < 0.001 | 0.022   |
| COCH                                    | -7.844             | < 0.001 | 0.022   |
| ANO8                                    | 3.516              | < 0.001 | 0.022   |
| LINC00623                               | 3.718              | < 0.001 | 0.022   |
| HSPA4                                   | -2.406             | < 0.001 | 0.023   |
| AOAH                                    | -6.704             | < 0.001 | 0.023   |
| HOXB3                                   | 4.793              | < 0.001 | 0.023   |
| SLC8A2                                  | 5.243              | < 0.001 | 0.023   |
| NPL                                     | 4.663              | < 0.001 | 0.025   |
| ZNF678                                  | 4.063              | < 0.001 | 0.025   |
| CNST                                    | 2.130              | < 0.001 | 0.025   |
| RNY5                                    | 3.224              | < 0.001 | 0.025   |
| PLEKHA8P1                               | -4.947             | < 0.001 | 0.025   |
| DUSP1                                   | 2.903              | < 0.001 | 0.027   |
| LOC100008589                            | 2.695              | < 0.001 | 0.028   |
| NRP2                                    | 6.969              | < 0.001 | 0.028   |
| EGR2                                    | 7.175              | < 0.001 | 0.029   |
| FCGR2B                                  | -6.697             | < 0.001 | 0.033   |
| NRG2                                    | 5.224              | < 0.001 | 0.033   |
| LOC221946                               | 5.139              | < 0.001 | 0.033   |
| PLCXD1                                  | 3.230              | < 0.001 | 0.033   |
| LACC1                                   | 4.975              | < 0.001 | 0.033   |

**Supplemental Table 2.** Top 50 genes that are differentially expressed in pDCs of IFN<sup>low</sup> SLE patients in comparison with pDCs from healthy controls (HC).

| Gene      | IFN <sup>high</sup> SLE pDCs vs. HC pDCs |         |         |
|-----------|------------------------------------------|---------|---------|
|           | Fold Change (log2)                       | P value | FDR     |
| IFI44     | 5.403                                    | < 0.001 | < 0.001 |
| CAMP      | 7.261                                    | < 0.001 | < 0.001 |
| OASL      | 6.812                                    | < 0.001 | < 0.001 |
| SLC8A2    | 5.644                                    | < 0.001 | < 0.001 |
| ATF3      | 5.870                                    | < 0.001 | < 0.001 |
| CMPK2     | 7.710                                    | < 0.001 | < 0.001 |
| BCL2      | 5.485                                    | < 0.001 | < 0.001 |
| LGALS1    | 6.240                                    | < 0.001 | < 0.001 |
| ORM1      | 8.011                                    | < 0.001 | < 0.001 |
| NCMAP     | 4.931                                    | < 0.001 | < 0.001 |
| HCG11     | -3.108                                   | < 0.001 | < 0.001 |
| PARP14    | 3.402                                    | < 0.001 | < 0.001 |
| MSL2      | 2.238                                    | < 0.001 | 0.001   |
| DDX60L    | 6.470                                    | < 0.001 | 0.001   |
| PPDPF     | 1.798                                    | < 0.001 | 0.001   |
| IER2      | 2.552                                    | < 0.001 | 0.001   |
| NR4A1     | 5.230                                    | < 0.001 | 0.002   |
| TFB1M     | -2.213                                   | < 0.001 | 0.002   |
| GFOD1     | 4.279                                    | < 0.001 | 0.002   |
| TP53INP2  | 5.236                                    | < 0.001 | 0.002   |
| TMEM177   | -3.452                                   | < 0.001 | 0.002   |
| LIPT1     | -2.499                                   | < 0.001 | 0.002   |
| JUND      | 2.486                                    | < 0.001 | 0.002   |
| THG1L     | -2.089                                   | < 0.001 | 0.002   |
| CCDC121   | 6.073                                    | < 0.001 | 0.002   |
| SNORD14C  | 4.151                                    | < 0.001 | 0.002   |
| C2orf74   | -2.833                                   | < 0.001 | 0.002   |
| CISD1     | -2.392                                   | < 0.001 | 0.002   |
| HIST1H4F  | -2.531                                   | < 0.001 | 0.002   |
| SEMA7A    | 3.150                                    | < 0.001 | 0.002   |
| ETV3L     | 3.865                                    | < 0.001 | 0.002   |
| CEACAM1   | 5.448                                    | < 0.001 | 0.002   |
| L3MBTL2   | -1.887                                   | < 0.001 | 0.002   |
| ETV3      | 2.959                                    | < 0.001 | 0.002   |
| NPAS1     | 5.469                                    | < 0.001 | 0.002   |
| QRICH2    | 4.336                                    | < 0.001 | 0.002   |
| LTC4S     | 5.089                                    | < 0.001 | 0.003   |
| ARID5A    | 1.781                                    | < 0.001 | 0.003   |
| EIF2AK2   | 2.358                                    | < 0.001 | 0.003   |
| HES4      | 4.895                                    | < 0.001 | 0.003   |
| LINC00847 | -2.487                                   | < 0.001 | 0.003   |
| NSUN7     | 5.334                                    | < 0.001 | 0.003   |
| DNAJB1    | 4.229                                    | < 0.001 | 0.003   |
| KLF8      | -4.556                                   | < 0.001 | 0.003   |
| RSAD2     | 4.959                                    | < 0.001 | 0.003   |
| JUN       | 2.582                                    | < 0.001 | 0.003   |
| MON1A     | -2.248                                   | < 0.001 | 0.003   |
| IFI44L    | 3.195                                    | < 0.001 | 0.004   |
| WDR87     | 6.155                                    | < 0.001 | 0.004   |
| IRAIN     | 4.774                                    | < 0.001 | 0.004   |

**Supplemental Table 3.** Top 50 genes that are differentially expressed in pDCs of IFN<sup>high</sup> SLE patients in comparison with pDCs from healthy controls (HC).

| Gene                                      | IFN <sup>low</sup> SLE pDCs vs. HC pDCs |         |         | IFN <sup>high</sup> SLE pDCs vs. HC pDCs |         |         |
|-------------------------------------------|-----------------------------------------|---------|---------|------------------------------------------|---------|---------|
|                                           | Fold Change (log2)                      | P value | FDR     | Fold Change (log2)                       | P value | FDR     |
| ETV3                                      | 3.037                                   | < 0.001 | 0.017   | 2.959                                    | < 0.001 | 0.002   |
| ATF3                                      | 3.914                                   | < 0.001 | 0.052   | 5.209                                    | < 0.001 | 0.000   |
| LIN9                                      | -3.716                                  | < 0.001 | 0.058   | -2.423                                   | < 0.001 | 0.031   |
| LGALS1                                    | 6.161                                   | < 0.001 | 0.007   | 6.240                                    | < 0.001 | < 0.001 |
| ZNF2                                      | -4.108                                  | < 0.001 | 0.058   | -2.907                                   | < 0.001 | 0.020   |
| LIPT1                                     | -3.224                                  | < 0.001 | 0.050   | -2.499                                   | < 0.001 | 0.002   |
| SEC24D                                    | -2.559                                  | < 0.001 | 0.051   | -1.605                                   | 0.001   | 0.038   |
| CXCL2                                     | 6.379                                   | < 0.001 | < 0.001 | 4.163                                    | < 0.001 | 0.019   |
| CBR4                                      | -3.260                                  | < 0.001 | 0.052   | -1.546                                   | < 0.001 | 0.011   |
| DUSP1                                     | 2.903                                   | < 0.001 | 0.027   | 2.386                                    | < 0.001 | 0.021   |
| LTC4S                                     | 5.509                                   | < 0.001 | 0.033   | 5.089                                    | < 0.001 | 0.003   |
| SNORD95                                   | 4.390                                   | < 0.001 | 0.007   | 3.106                                    | < 0.001 | 0.016   |
| PHF3                                      | 1.125                                   | < 0.001 | 0.015   | 1.531                                    | < 0.001 | 0.028   |
| LOC441242                                 | -2.798                                  | 0.001   | 0.068   | -2.494                                   | < 0.001 | 0.015   |
| FUT10                                     | -3.275                                  | 0.002   | 0.100   | -2.388                                   | < 0.001 | 0.016   |
| LOC102724580                              | 3.699                                   | 0.001   | 0.088   | 4.080                                    | < 0.001 | 0.004   |
| CCL19                                     | 4.468                                   | < 0.001 | 0.057   | 3.828                                    | < 0.001 | 0.020   |
| CTSL                                      | 6.460                                   | < 0.001 | 0.040   | 4.114                                    | < 0.001 | 0.020   |
| PUDP                                      | -2.632                                  | < 0.001 | 0.058   | -2.752                                   | < 0.001 | 0.008   |
| ATP7A                                     | -4.215                                  | < 0.001 | 0.035   | -2.853                                   | < 0.001 | 0.020   |
| SAT1                                      | 1.642                                   | < 0.001 | 0.036   | 1.805                                    | < 0.001 | 0.009   |
| MIR6087                                   | 2.376                                   | < 0.001 | 0.050   | 2.411                                    | < 0.001 | 0.028   |
| ZFP91                                     | 2.619                                   | < 0.001 | 0.046   | 2.147                                    | 0.001   | 0.043   |
| PAAF1                                     | -3.453                                  | 0.001   | 0.066   | -1.973                                   | < 0.001 | 0.033   |
| DUSP8                                     | 6.050                                   | 0.001   | 0.085   | 6.392                                    | < 0.001 | 0.006   |
| IRAK3                                     | 6.179                                   | < 0.001 | 0.045   | 4.152                                    | < 0.001 | 0.007   |
| PLEKHA8P1                                 | -4.947                                  | < 0.001 | 0.025   | -2.810                                   | < 0.001 | 0.009   |
| ACVR1B                                    | 5.196                                   | 0.001   | 0.059   | 4.169                                    | < 0.001 | 0.017   |
| RN7SL1                                    | 2.867                                   | < 0.001 | 0.049   | 2.648                                    | < 0.001 | 0.034   |
| RN7SL2                                    | 3.107                                   | < 0.001 | 0.033   | 2.806                                    | < 0.001 | 0.021   |
| ATG14                                     | 2.520                                   | < 0.001 | 0.058   | 1.640                                    | < 0.001 | 0.028   |
| REREP3                                    | 3.757                                   | < 0.001 | 0.046   | 3.672                                    | < 0.001 | 0.019   |
| IRAIN                                     | 5.493                                   | < 0.001 | 0.015   | 4.774                                    | < 0.001 | 0.004   |
| CDH1                                      | 3.795                                   | 0.001   | 0.061   | 2.895                                    | < 0.001 | 0.028   |
| SCARNA21                                  | 2.549                                   | 0.001   | 0.074   | 2.980                                    | 0.001   | 0.041   |
| C5AR1                                     | 6.724                                   | 0.002   | 0.098   | 5.210                                    | < 0.001 | 0.031   |
| SLC8A2                                    | 5.243                                   | < 0.001 | 0.023   | 5.644                                    | < 0.001 | < 0.001 |
| IER2                                      | 2.416                                   | < 0.001 | 0.050   | 2.552                                    | < 0.001 | 0.001   |
| DNAJB1                                    | 2.108                                   | < 0.001 | 0.015   | 4.097                                    | < 0.001 | 0.005   |
| NPAS1                                     | 5.880                                   | < 0.001 | 0.020   | 5.469                                    | < 0.001 | 0.002   |
| LOC100008589                              | 2.695                                   | < 0.001 | 0.028   | 2.969                                    | < 0.001 | 0.006   |
| MIR3687-1                                 | 3.321                                   | 0.002   | 0.098   | 3.448                                    | < 0.001 | 0.007   |
| MIR3687-2                                 | 3.321                                   | 0.002   | 0.098   | 3.448                                    | < 0.001 | 0.007   |
| LOC100861532                              | 2.839                                   | < 0.001 | 0.007   | 2.930                                    | < 0.001 | 0.005   |
| WRB                                       | -2.306                                  | 0.001   | 0.068   | -2.027                                   | < 0.001 | 0.008   |
| <b>pDC-specific transcription factors</b> |                                         |         |         |                                          |         |         |
| E2-2 (TCF4)                               | 0.691                                   | 0.118   | 0.537   | 0.313                                    | 0.578   | 0.852   |
| SPIB                                      | 0.657                                   | 0.279   | 0.719   | 0.235                                    | 0.744   | 0.922   |

**Supplemental Table 4.** Genes that are differentially expressed in pDCs of both IFN<sup>low</sup> and IFN<sup>high</sup> SLE patients in comparison with pDCs from healthy controls (HC).
